# Supplementary material for: A multi-study analysis enables identification of potential microbial features associated with skin aging signs
Source: Front Aging. 2024 Jan 11;4:1304705. doi: 10.3389/fragi.2023.1304705 (PMC10868648; doi:10.3389/fragi.2023.1304705)
Supplement: Supplementary file 6 [file Table1.xlsx]

## Sheet: Table S1
Supplementary table S1: detailed information about the 13 studies
Study	Country	Number of subjects	Ethnicity	Age	BMI	Smoking Status	Reproductive Status	Main inclusion criteria	Clinical evaluations	Instrumental evaluations	Sequencing platform	Ethics reviews	Qiita study ID	EBI accession
Study 1	Mauritius	N=30	Asian	55 to 70 yo	≤ 30,0 Kg.m-²	Smoker not more than 3 cigarettes / day	Menopaused	•Chronological age similar with Asian crow feet wrinkles score from 4 to 6.	•Crow's feet wrinkles, photographic scale 0 to 6	NA	Illumina MiSeq system for 300bp paired-end sequencing at the Genomics Center, CHU de Québec-Université, Laval Research Center, Canada	The study was performed by Insight Research Ltd (Quatres-Bornes, Mauritius) in agreement with the recommendations of the Declaration of Helsinki and was approved by the local ethics committee (Study n° ACR_GENIBIOM1_18_07171 , Mauritius, 03.09.2018).	13521	PRJEB71408
								•Photo-aged equivalent with Asian lateral facial pigmentation score from 3 to 5.	•Pigmentation of lateral part of the cheek, photographic scale 0 to 6
								•Sensitive to a specific cleanser with a tightness scale ≥ 3 on a scale frome 0 to 4
Study 2	Mauritius	N=32	Asian	55 to 70 yo	≤ 30,0 Kg.m-²	Smoker not more than 3 cigarettes / day	Menopaused	•Chronological age similar with Asian crow feet wrinkles score from 4 to 6.	•Crow's feet wrinkles, photographic scale 0 to 6	NA	Illumina MiSeq system for 300bp paired-end sequencing at the Genomics Center, CHU de Québec-Université, Laval Research Center, Canada	The study was performed by Insight Research Ltd (Quatres-Bornes, Mauritius) in agreement with the recommendations of the Declaration of Helsinki and was approved by the local ethics committee (Study n° ACR/ GENIBIOM2/18-07173 , Mauritius, 04.06.2018).	13522	PRJEB71442
								•Photo-aged equivalent with Asian lateral facial pigmentation score from 3 to 5.	•Pigmentation of lateral part of the cheek, photographic scale 0 to 6
								•Sensitive to a specific cleanser with a tightness scale ≥ 3 on a scale frome 0 to 4
Study 3	Singapore	N=27	Asian	55 to 65 yo	18.5 – 24.9	Non smokers or those who quit smoking for at least 5 years	Menopaused	•Subject presenting fine lines wrinkles visibility score ≥ 4 on whole face	•Dryness (5 points scale)	•TEWL* Right cheek	Illumina MiSeq system for 300bp paired-end sequencing at the Genomics Center, CHU de Québec-Université, Laval Research Center, Canada	The study was performed by Centre International de Développement Pharmaceutique Pvt. Ltd. (CIDP) (Singapore) in agreement with the recommendations of the Declaration of Helsinki and was approved by the local ethics committee (Study n° ACR-MRGNF-18-0704 ,Singapore, 23.05.2018).	13580	PRJEB71446
								•Subject presenting lack of skin luminosity/radiance score ≥ 4 on whole face	•Roughness (5 points scale)
								•Subject presenting skin tone evenness score ≥ 4 on whole face
Study 4	France	N=28	Caucasian	55 to 65 yo	18.5 – 27	Non smokers or not more than 3 cigarettes / day	Menopaused	•Chronological age similar with Asian crow feet wrinkles score from 4 to 6	•Crow’s feet wrinkles photographic scale 0 to 6 Caucasian	•TEWL Right cheek	Illumina MiSeq system for 300bp paired-end sequencing at the Genomics Center, GET-IT, Narbonne, France	The study was performed by DERMSCAN (Villeurbane, France) in agreement with the recommendations of the Declaration of Helsinki and was approved by the local ethics committee (Study n° EV1805-0905/ID18-07780, France, 20.09.2018).	13581	PRJEB71478
								•Photo-aged equivalent with Asia lateral facial pigmentation score from 3 to 5	•Dryness (5 points scale)
								•Sensitive to a specific cleanser with a tightness scale ≥ 3 on a scale from 0 to 4
Study 5	Japan	N=32	Asian	55 to 65 yo	18.5 and 24.9	Non smokers or those who quit smoking for at least 5 years	Menopaused	• Subject presenting with a skin tightness (inclusion grade ≥ 3) on the whole face on a scale from 0 to 4 by self-assessment after the usage of specific cleanser	•Dryness (5 points scale)	•TEWL Right cheek	Illumina MiSeq system for 300bp paired-end sequencing at the Genomics Center,Tak-Circulator, Japan	The study was performed by IEC (Japan) in agreement with the recommendations of the Declaration of Helsinki and was approved by the local ethics committee (Protocol N° J182247PE -Version 1, of 16/01/2019)	13600	PRJEB71448
									•Roughness (5 points scale)
Study 6	France	N=28	Caucasian	18 to 45 yo	≤ 30.0 Kg.m-2.	Smoker not more than 6 cigarettes / day	Non menopausal	•Sensitive skin according to sponsor questionnaire	•Dryness (5 points scale)	•TEWL Right Cheek	Illumina MiSeq system for 300bp paired-end sequencing at the Genomics Center, GET-IT, Narbonne, France	The study was performed by DERMSCAN (Villeurbane, France) in agreement with the recommendations of the Declaration of Helsinki and was approved by the local ethics committee (Study n° ACR/PREBIO/17-12515 , France, 08.11.2017).	13520	PRJEB71514
								•Sensitive to the specific cleanser with a discomfort ≥ 3 on a scale from 0 to 4.	•Roughness (5 points scale)	•Hydration Left cheek
Study 7	France	N=40	Caucasian	18 to 45 yo			Non menopausal	•Declaring herself sensitive skin	•Dryness (5 points scale)	NA	Illumina MiSeq system for 300bp paired-end sequencing at the Genomics Center, GET-IT, Narbonne, France	The study was performed by BIO-EC (Longjumeau, France) in agreement with the recommendations of the Declaration of Helsinki and was approved by the local ethics committee (Study n° EV1712-0779/ID17-14796, France, 24.09.2019).	13582	PRJEB71479
								•Having a discomfort score after specific cleanser greater than 3	•Roughness (5 points scale)
Study 8	France	N=50	Caucasian	18 to 45 yo	≤ 30.0 Kg.m-2.	Smoker not more than 6 cigarettes / day.	Non menopausal	•Sensitive skin according to sponsor questionnaire	•Dryness (5 points scale)	•TEWL Right Cheek	Illumina MiSeq system for 300bp paired-end sequencing at the Genomics Center, GET-IT, Narbonne, France	The study was performed by DERMSCAN (Villeurbane, France) in agreement with the recommendations of the Declaration of Helsinki and was approved by the local ethics committee (Study n° EV1803-0046/ ID18-03192 , France, 13.09.2019).	13583	PRJEB71515
								•Sensitive to the specific cleanser with a discomfort ≥ 3 on a scale from 0 to 4.	•Roughness (5 points scale)	•Hydration Left Cheek
Study 9	France	N=41	Caucasian	18 to 45 yo	≤ 30.0 Kg.m-2.	Smoker not more than 6 cigarettes / day	Non menopausal	•Sensitive skin according to sponsor questionnaire	•Dryness (5 points scale)	•Hydration Left Cheek	Illumina MiSeq system for 300bp paired-end sequencing at the Genomics Center, GET-IT, Narbonne, France	The study was performed by DERMSCAN (Villeurbane, France) in agreement with the recommendations of the Declaration of Helsinki and was approved by the local ethics committee (Study n° EV1806-0805/18-09174 , France, 23.07.2019).	13584	PRJEB71517
								•Sensitive to the specific cleanser with a discomfort ≥ 3 on a scale from 0 to 4.	•Roughness (5 points scale)
Study 11	China	N=204	Asian	25 to 45 yo		Non smoker subject or having stopped at least 5 years ago	Non menopausal	•NA	•Crow’s feet wrinkles Asian	•Sebum measurement	Illumina MiSeq system for 300bp paired-end sequencing at the School of Energy and Environment, City University of Hong Kong, Hong Kong SAR, China	The study was performed by the Sino-German Cosmetics Institute (Beijing) in agreement with the recommendations of the Declaration of Helsinki and was approved by the local ethics committee (Study n° 2015-033-DY-024, CAIQ Cosmetics Tech Center, Beijing, China, 19.08.2015).	13632	PRJEB71520
										•Color measurement
Study 12	USA	N=68	Caucasian or Asian	20 to 55 yo		Non smoker	Non menopausal	•NA		•Hydration cheek	Illumina MiSeq system for 300bp paired-end sequencing at the Genomics Center, CHU de Québec-Université, Laval Research Center, Canada	The study was performed by L’Oreal USA – ACR Clinical Innovation (Clark, New-Jersey, USA) in agreement with the recommendations of the Declaration of Helsinki and was approved by the local ethics committee (Study n° ACR-CLEB-17-US003, USA, 01.11.2017).	13585	PRJEB71680
										•Sebum measurement
Study 13	USA	N=95		30 to 46 yo			Non menopausal	•Mild to moderate photo-damage on the face (score of 2-6);		•Hydration	Illumina MiSeq system for 300bp paired-end sequencing at the Genomics Center, CHU de Québec-Université, Laval Research Center, Canada	The study was performed by Biometrix USA (San Francisco, CA, USA) in agreement with the recommendations of the Declaration of Helsinki and was approved by the local ethics committee (Study n° ACR-PROPR-EC-01 , USA, 10.11.2017).	13563	PRJEB71682
								•Subject has a score of 3 or greater for radiance and smoothness (tactile) on the face		•Color measurement
Study 14	France	N=30	Caucasian	30 to 50 yo	≤ 30.0 Kg.m-2.	Smoker not more than 3 cigarettes / day.	Non menopausal	•Sensitive to the specific cleanser with a discomfort ≥ 3 on a scale from 0 to 4.	•Crow’s feet wrinkles Caucasian	•TEWL Right Cheek	Illumina MiSeq system for 300bp paired-end sequencing at the Genomics Center, CHU de Québec-Université, Laval Research Center, Canada	The study was performed by DERMSCAN (Villeurbane, France) in agreement with the recommendations of the Declaration of Helsinki and was approved by the local ethics committee (Study n° ACR/CLEANBIO/16-0050, France, 22.06.2016).	13554	PRJEB71684
								•Apparent age similar with a crow feet wrinkles score from 0 to 3.		•Hydration Left Cheek
								•Photo-aged equivalent with a Griffith score from 0 to 4.

## Sheet: Table S2
featureid	covariate_gow	grade_of_wrinkles	phi_x	covariate_age	host_age	phi_y	select_25perc	Numerator__grade_of_wrinkles	grade_of_wrinkles_rank
d__Bacteria;p__Actinobacteriota;c__Actinobacteria;o__Actinomycetales;f__Actinomycetaceae;g__Mobiluncus;s__Mobiluncus_curtisii	grade_of_wrinkles	1.01384	0.0394	host_age	-0.270889	0.0394	TRUE	Numerator	21
d__Bacteria;p__Actinobacteriota;c__Actinobacteria;o__Corynebacteriales;f__Corynebacteriaceae;g__Corynebacterium;s__Corynebacterium_minutissimum	grade_of_wrinkles	0.931871	0.0324225	host_age	-0.142771	0.0324225	TRUE	Numerator	26
d__Bacteria;p__Actinobacteriota;c__Actinobacteria;o__Corynebacteriales;f__Corynebacteriaceae;g__Corynebacterium;s__Corynebacterium_striatum	grade_of_wrinkles	-1.02049	0.0200753	host_age	0.075152	0.0200753	TRUE	Denominator	18
d__Bacteria;p__Actinobacteriota;c__Actinobacteria;o__Corynebacteriales;f__Corynebacteriaceae;g__Corynebacterium;s__Corynebacterium_xerosis	grade_of_wrinkles	0.875909	0.0717778	host_age	-0.0901987	0.0717778	TRUE	Numerator	35
d__Bacteria;p__Actinobacteriota;c__Actinobacteria;o__Corynebacteriales;f__Corynebacteriaceae;g__Turicella;s__Turicella_otitidis	grade_of_wrinkles	-1.94596	0.0392624	host_age	0.100765	0.0392624	TRUE	Denominator	1
d__Bacteria;p__Actinobacteriota;c__Actinobacteria;o__Corynebacteriales;f__Nocardiaceae;g__Millisia;s__Millisia_brevis	grade_of_wrinkles	0.944699	0.0270272	host_age	-0.18042	0.0270272	TRUE	Numerator	25
d__Bacteria;p__Actinobacteriota;c__Actinobacteria;o__Frankiales;f__Geodermatophilaceae;g__Geodermatophilus;__	grade_of_wrinkles	-0.898607	0.0236336	host_age	0.0353492	0.0236336	TRUE	Denominator	30
d__Bacteria;p__Actinobacteriota;c__Actinobacteria;o__Micrococcales;f__Brevibacteriaceae;g__Brevibacterium;s__Brevibacterium_aurantiacum	grade_of_wrinkles	-1.71068	0.0638659	host_age	0.0793311	0.0638659	TRUE	Denominator	3
d__Bacteria;p__Actinobacteriota;c__Actinobacteria;o__Micrococcales;f__Brevibacteriaceae;g__Brevibacterium;s__Brevibacterium_ravenspurgense	grade_of_wrinkles	1.69348	0.0114828	host_age	-0.139598	0.0114828	TRUE	Numerator	4
d__Bacteria;p__Actinobacteriota;c__Actinobacteria;o__Micrococcales;f__Intrasporangiaceae;g__Janibacter;s__uncultured_bacterium	grade_of_wrinkles	-0.959086	0.0226175	host_age	0.030158	0.0226175	TRUE	Denominator	23
d__Bacteria;p__Actinobacteriota;c__Actinobacteria;o__Micrococcales;f__Microbacteriaceae;g__Microbacterium;s__Microbacterium_lacus	grade_of_wrinkles	1.15392	0.0225784	host_age	-0.115441	0.0225784	TRUE	Numerator	10
d__Bacteria;p__Actinobacteriota;c__Actinobacteria;o__Micrococcales;f__Microbacteriaceae;g__Pseudoclavibacter;__	grade_of_wrinkles	1.13851	0.0386038	host_age	-0.0923713	0.0386038	TRUE	Numerator	13
d__Bacteria;p__Actinobacteriota;c__Actinobacteria;o__Micrococcales;f__Micrococcaceae;g__Kocuria;s__uncultured_bacterium	grade_of_wrinkles	-0.946039	0.106791	host_age	0.192008	0.106791	TRUE	Denominator	24
d__Bacteria;p__Actinobacteriota;c__Actinobacteria;o__Propionibacteriales;f__Propionibacteriaceae;g__Marinilutecoccus;s__Propionibacterineae_bacterium	grade_of_wrinkles	0.895397	0.0240385	host_age	-0.145528	0.0240385	TRUE	Numerator	31
d__Bacteria;p__Actinobacteriota;c__Actinobacteria;o__Propionibacteriales;f__Propionibacteriaceae;g__Pseudopropionibacterium;s__Propionibacterium_sp.	grade_of_wrinkles	-0.919854	0.049743	host_age	0.0712221	0.049743	TRUE	Denominator	28
d__Bacteria;p__Bacteroidota;c__Bacteroidia;o__Bacteroidales;f__Prevotellaceae;g__Prevotella;s__Prevotella_disiens	grade_of_wrinkles	-1.01531	0.0248176	host_age	0.0413741	0.0248176	TRUE	Denominator	20
d__Bacteria;p__Bacteroidota;c__Bacteroidia;o__Bacteroidales;f__Prevotellaceae;g__Prevotella;s__Prevotella_genomosp.	grade_of_wrinkles	0.884751	0.0283027	host_age	-0.0856109	0.0283027	TRUE	Numerator	34
d__Bacteria;p__Bacteroidota;c__Bacteroidia;o__Flavobacteriales;f__Weeksellaceae;g__Chryseobacterium;s__Kaistella_flava	grade_of_wrinkles	1.01744	0.0256859	host_age	-0.188111	0.0256859	TRUE	Numerator	19
d__Bacteria;p__Bacteroidota;c__Bacteroidia;o__Sphingobacteriales;f__Sphingobacteriaceae;g__Nubsella;__	grade_of_wrinkles	1.22596	0.0221389	host_age	-0.216723	0.0221389	TRUE	Numerator	8
d__Bacteria;p__Bacteroidota;c__Bacteroidia;o__Sphingobacteriales;f__Sphingobacteriaceae;g__Sphingobacterium;s__Sphingobacterium_daejeonense	grade_of_wrinkles	1.62248	0.0208121	host_age	-0.217672	0.0208121	TRUE	Numerator	5
d__Bacteria;p__Campilobacterota;c__Campylobacteria;o__Campylobacterales;f__Campylobacteraceae;g__Campylobacter;s__Campylobacter_rectus	grade_of_wrinkles	1.14365	0.0324067	host_age	-0.112123	0.0324067	TRUE	Numerator	12
d__Bacteria;p__Deinococcota;c__Deinococci;o__Deinococcales;f__Deinococcaceae;g__Deinococcus;s__unidentified	grade_of_wrinkles	1.86954	0.0223573	host_age	-0.270243	0.0223573	TRUE	Numerator	2
d__Bacteria;p__Firmicutes;c__Bacilli;o__Lactobacillales;f__Lactobacillaceae;g__Lactobacillus;s__Lactobacillus_sakei	grade_of_wrinkles	1.26181	0.0244347	host_age	-0.257423	0.0244347	TRUE	Numerator	7
d__Bacteria;p__Firmicutes;c__Bacilli;o__Lactobacillales;f__Streptococcaceae;g__Streptococcus;s__Streptococcus_vestibularis	grade_of_wrinkles	1.04462	0.0147269	host_age	-0.0425543	0.0147269	TRUE	Numerator	17
d__Bacteria;p__Firmicutes;c__Bacilli;o__Mycoplasmatales;f__Mycoplasmataceae;g__Mycoplasma;__	grade_of_wrinkles	0.900149	0.0357962	host_age	-0.137081	0.0357962	TRUE	Numerator	29
d__Bacteria;p__Firmicutes;c__Bacilli;o__Staphylococcales;f__Staphylococcaceae;g__Staphylococcus;s__Staphylococcus_auricularis	grade_of_wrinkles	1.12041	0.0832373	host_age	-0.138895	0.0832373	TRUE	Numerator	14
d__Bacteria;p__Firmicutes;c__Bacilli;o__Staphylococcales;f__Staphylococcaceae;g__Staphylococcus;s__Staphylococcus_equorum	grade_of_wrinkles	-1.14593	0.0464876	host_age	0.156807	0.0464876	TRUE	Denominator	11
d__Bacteria;p__Firmicutes;c__Clostridia;o__Lachnospirales;f__Lachnospiraceae;g__Stomatobaculum;s__Eubacterium_sp.	grade_of_wrinkles	-1.31759	0.0354552	host_age	0.107712	0.0354552	TRUE	Denominator	6
d__Bacteria;p__Firmicutes;c__Clostridia;o__Peptostreptococcales-Tissierellales;f__Peptostreptococcaceae;g__Peptostreptococcus;__	grade_of_wrinkles	-0.989616	0.0517708	host_age	0.104946	0.0517708	TRUE	Denominator	22
d__Bacteria;p__Firmicutes;c__Clostridia;o__Peptostreptococcales-Tissierellales;f__Peptostreptococcales-Tissierellales;g__Murdochiella;s__Murdochiella_sp.	grade_of_wrinkles	0.894449	0.0441984	host_age	-0.188977	0.0441984	TRUE	Numerator	32
d__Bacteria;p__Firmicutes;c__Negativicutes;o__Veillonellales-Selenomonadales;f__Veillonellaceae;g__Dialister;s__Dialister_micraerophilus	grade_of_wrinkles	-1.10544	0.0340437	host_age	-0.0658928	0.0340437	TRUE	Denominator	15
d__Bacteria;p__Patescibacteria;c__Saccharimonadia;o__Saccharimonadales;f__Saccharimonadaceae;g__TM7a;s__uncultured_bacterium	grade_of_wrinkles	1.06713	0.0529705	host_age	-0.0948439	0.0529705	TRUE	Numerator	16
d__Bacteria;p__Proteobacteria;c__Alphaproteobacteria;o__Acetobacterales;f__Acetobacteraceae;g__Roseomonas;s__Roseomonas_gilardii	grade_of_wrinkles	0.889652	0.0151631	host_age	-0.0313651	0.0151631	TRUE	Numerator	33
d__Bacteria;p__Proteobacteria;c__Alphaproteobacteria;o__Rhizobiales;f__Xanthobacteraceae;g__Xanthobacter;__	grade_of_wrinkles	0.922242	0.0141699	host_age	-0.0870654	0.0141699	TRUE	Numerator	27
d__Bacteria;p__Proteobacteria;c__Gammaproteobacteria;o__Xanthomonadales;f__Xanthomonadaceae;g__Lysobacter;__	grade_of_wrinkles	-1.20781	0.0650088	host_age	0.216592	0.0650088	TRUE	Denominator	9

## Sheet: Table S3
featureid	covariate_tewl	tewl	phi_x	covariate_age	host_age	phi_y	tewl_rank	Numerator__tewl	tewl_Numerator_rank	select_perc
d__Bacteria;p__Acidobacteriota;c__Blastocatellia;o__Blastocatellales;f__Blastocatellaceae;g__Blastocatella;s__uncultured_bacterium	tewl	-0.348115	0.0269845	host_age	-0.0271646	0.0269845	2	Denominator	2	TRUE
d__Bacteria;p__Acidobacteriota;c__Vicinamibacteria;o__Vicinamibacterales;f__Vicinamibacteraceae;g__Vicinamibacteraceae;__	tewl	-0.281556	0.0331356	host_age	0.0368005	0.0331356	7	Denominator	6	TRUE
d__Bacteria;p__Actinobacteriota;c__Actinobacteria;o__Corynebacteriales;f__Nocardiaceae;__;__	tewl	-0.303737	0.0552263	host_age	0.0721873	0.0552263	5	Denominator	4	TRUE
d__Bacteria;p__Bacteroidota;c__Bacteroidia;o__Flavobacteriales;f__Flavobacteriaceae;g__Flavobacterium;s__Flavobacterium_hauense	tewl	-0.223577	0.100845	host_age	-0.0335686	0.100845	11	Denominator	10	TRUE
d__Bacteria;p__Bacteroidota;c__Bacteroidia;o__Flavobacteriales;f__Weeksellaceae;__;__	tewl	-0.223746	0.0264915	host_age	0.0553563	0.0264915	10	Denominator	9	TRUE
d__Bacteria;p__Bacteroidota;c__Bacteroidia;o__Flavobacteriales;f__Weeksellaceae;g__Empedobacter;s__Empedobacter_sp.	tewl	-0.235378	0.0152071	host_age	0.0508679	0.0152071	9	Denominator	8	TRUE
d__Bacteria;p__Campilobacterota;c__Campylobacteria;o__Campylobacterales;f__Campylobacteraceae;g__Campylobacter;s__Campylobacter_rectus	tewl	-0.295801	0.0380644	host_age	0.0233614	0.0380644	6	Denominator	5	TRUE
d__Bacteria;p__Firmicutes;c__Bacilli;o__Bacillales;f__Bacillaceae;g__Bacillus;s__Bacillus_pseudofirmus	tewl	-0.464287	0.191941	host_age	-0.0667709	0.191941	1	Denominator	1	TRUE
d__Bacteria;p__Firmicutes;c__Bacilli;o__Staphylococcales;f__Staphylococcaceae;g__Staphylococcus;s__Staphylococcus_vitulinus	tewl	-0.331165	0.0510955	host_age	0.0647578	0.0510955	3	Denominator	3	TRUE
d__Bacteria;p__Firmicutes;c__Clostridia;o__Lachnospirales;f__Lachnospiraceae;g__Blautia;__	tewl	-0.220417	0.0312426	host_age	0.0639919	0.0312426	12	Denominator	11	TRUE
d__Bacteria;p__Patescibacteria;c__Saccharimonadia;o__Saccharimonadales;f__Saccharimonadaceae;__;__	tewl	0.308397	0.0216523	host_age	-0.12037	0.0216523	4	Numerator	1	TRUE
d__Bacteria;p__Proteobacteria;c__Alphaproteobacteria;o__Rhizobiales;f__Xanthobacteraceae;g__Xanthobacter;__	tewl	-0.260974	0.0171581	host_age	0.0492181	0.0171581	8	Denominator	7	TRUE
d__Bacteria;p__Proteobacteria;c__Gammaproteobacteria;o__Pseudomonadales;f__Pseudomonadaceae;__;__	tewl	-0.216719	0.0452581	host_age	0.0514262	0.0452581	13	Denominator	12	TRUE

## Sheet: Table S4
featureid	covariate_corneometer	corneometer	phi_x	covariate_age	host_age	phi_y	corneometer_rank	Numerator__corneometer	corneometer_Numerator_rank	select_perc
d__Bacteria;p__Acidobacteriota;c__Vicinamibacteria;o__Vicinamibacterales;__;__;__	corneometer	-0.0996115	0.0682168	host_age	-0.0371022	0.0682168	15	Denominator	13	TRUE
d__Bacteria;p__Actinobacteriota;c__Actinobacteria;o__Corynebacteriales;f__Corynebacteriaceae;g__Corynebacterium;s__Corynebacterium_humireducens	corneometer	-0.102315	0.122426	host_age	0.0125447	0.122426	11	Denominator	9	TRUE
d__Bacteria;p__Actinobacteriota;c__Actinobacteria;o__Corynebacteriales;f__Tsukamurellaceae;g__Tsukamurella;s__Tsukamurella_pulmonis	corneometer	-0.107934	0.0628722	host_age	0.0749817	0.0628722	8	Denominator	7	TRUE
d__Bacteria;p__Actinobacteriota;c__Actinobacteria;o__Frankiales;__;__;__	corneometer	-0.127429	0.0799405	host_age	0.103982	0.0799405	1	Denominator	1	TRUE
d__Bacteria;p__Actinobacteriota;c__Actinobacteria;o__Micrococcales;f__Intrasporangiaceae;g__Janibacter;s__uncultured_bacterium	corneometer	0.109011	0.0626515	host_age	-0.157497	0.0626515	5	Numerator	1	TRUE
d__Bacteria;p__Actinobacteriota;c__Actinobacteria;o__Propionibacteriales;f__Propionibacteriaceae;g__Cutibacterium;s__Propionibacterium_humerusii	corneometer	-0.101578	0.0587192	host_age	0.16286	0.0587192	12	Denominator	10	TRUE
d__Bacteria;p__Bacteroidota;c__Bacteroidia;o__Chitinophagales;f__Chitinophagaceae;g__Flaviaesturariibacter;s__uncultured_soil	corneometer	-0.107992	0.108973	host_age	0.0157839	0.108973	7	Denominator	6	TRUE
d__Bacteria;p__Firmicutes;c__Bacilli;o__Bacillales;f__Bacillaceae;__;__	corneometer	-0.11155	0.133411	host_age	0.0650553	0.133411	4	Denominator	4	TRUE
d__Bacteria;p__Firmicutes;c__Bacilli;o__Bacillales;f__Bacillaceae;g__Anaerobacillus;__	corneometer	-0.101029	0.140552	host_age	0.121154	0.140552	13	Denominator	11	TRUE
d__Bacteria;p__Firmicutes;c__Bacilli;o__Lactobacillales;f__Aerococcaceae;g__Aerococcus;s__Aerococcus_christensenii	corneometer	-0.108876	0.0816302	host_age	0.0777845	0.0816302	6	Denominator	5	TRUE
d__Bacteria;p__Firmicutes;c__Bacilli;o__Lactobacillales;f__Lactobacillaceae;g__Lactobacillus;s__Lactobacillus_acidophilus	corneometer	0.10274	0.0542771	host_age	-0.278326	0.0542771	10	Numerator	2	TRUE
d__Bacteria;p__Firmicutes;c__Clostridia;o__Peptostreptococcales-Tissierellales;f__Anaerovoracaceae;g__[Eubacterium]_saphenum_group;s__Eubacterium_saphenum	corneometer	-0.100786	0.206851	host_age	0.0662902	0.206851	14	Denominator	12	TRUE
d__Bacteria;p__Proteobacteria;c__Alphaproteobacteria;o__Acetobacterales;f__Acetobacteraceae;g__Roseomonas;s__Roseomonas_genomospecies	corneometer	0.0991357	0.0947966	host_age	-0.085117	0.0947966	16	Numerator	3	TRUE
d__Bacteria;p__Proteobacteria;c__Alphaproteobacteria;o__Rhizobiales;f__Xanthobacteraceae;g__Xanthobacter;__	corneometer	-0.119192	0.0491503	host_age	0.0625907	0.0491503	2	Denominator	2	TRUE
d__Bacteria;p__Proteobacteria;c__Alphaproteobacteria;o__Sphingomonadales;f__Sphingomonadaceae;g__Sphingomonas;s__Sphingomonas_panaciterrae	corneometer	0.0918936	0.0740645	host_age	-0.0794305	0.0740645	18	Numerator	4	TRUE
d__Bacteria;p__Proteobacteria;c__Gammaproteobacteria;o__Alteromonadales;f__Pseudoalteromonadaceae;g__Pseudoalteromonas;__	corneometer	-0.0932877	0.0483508	host_age	0.0511895	0.0483508	17	Denominator	14	TRUE
d__Bacteria;p__Proteobacteria;c__Gammaproteobacteria;o__Enterobacterales;f__Yersiniaceae;g__Serratia;__	corneometer	-0.115528	0.108768	host_age	0.0543051	0.108768	3	Denominator	3	TRUE
d__Bacteria;p__Proteobacteria;c__Gammaproteobacteria;o__Pseudomonadales;f__Moraxellaceae;g__Psychrobacter;s__Psychrobacter_sanguinis	corneometer	-0.104618	0.0933909	host_age	0.0748447	0.0933909	9	Denominator	8	TRUE
